1 Quantifying the Risk of Indoor Drainage System in Multi-unit Apartment Building as a  
2 Transmission Route of SARS-CoV-2

3

4 Kuang-Wei Shi<sup>a</sup>, Yen-Hsiang Huang<sup>b</sup>, Hunter Quon<sup>b</sup>, Zi-Lu Ou-Yang<sup>a</sup>, Chengwen Wang<sup>a\*</sup>,  
5 Sunny C. Jiang<sup>b\*</sup>

6

7 <sup>a</sup>School of Environment, Tsinghua University, Beijing, China

8 <sup>b</sup>Civil and Environmental Engineering, University of California, Irvine, USA

9

10 \*Correspondence:

11 Chengwen Wang, Room 735, School of Environment, Tsinghua University, Beijing, China,

12 100084; Tel: (+86) 010-627-71551; E-mail: [wangcw@tsinghua.edu.cn](mailto:wangcw@tsinghua.edu.cn)

13 Sunny Jiang, 844E Engineering Tower, UC Irvine, California, 92697; Tel: 949-824-5527;

14 E-mail: [sjiang@uci.edu](mailto:sjiang@uci.edu)

15

16 **Abstract:**

17 The COVID-19 pandemic has had a profound impact on human society. The isolation of  
18 SARS-CoV-2 from patients' feces on human cell line raised concerns of possible transmission  
19 through human feces including exposure to aerosols generated by toilet flushing and through  
20 the indoor drainage system. Currently, routes of transmission, other than the close contact  
21 droplet transmission, are still not well understood. A quantitative microbial risk assessment was  
22 conducted to estimate the health risks associated with two aerosol exposure scenarios: 1) toilet  
23 flushing, and 2) faulty connection of a floor drain with the building's main sewer pipe.  
24 SARS-CoV-2 data were collected from the emerging literature. The infectivity of the virus in  
25 feces was estimated based on a range of assumption between viral genome equivalence and  
26 infectious unit. The human exposure dose was calculated using Monte Carlo simulation of viral  
27 concentrations in aerosols under each scenario and human breathing rates. The probability of  
28 COVID-19 illness was generated using the dose-response model for SARS-CoV-1, a close  
29 relative of SARS-CoV-2, that was responsible for the SARS outbreak in 2003. The results  
30 indicate the median risks of developing COVID-19 for a single day exposure is  $1.11 \times 10^{-10}$  and  
31  $3.52 \times 10^{-11}$  for toilet flushing and faulty drain scenario, respectively. The worst case scenario  
32 predicted the high end of COVID-19 risk for the toilet flushing scenario was  $5.78 \times 10^{-4}$  (at 95<sup>th</sup>  
33 percentile). The infectious viral loads in human feces are the most sensitive input parameter and  
34 contribute significantly to model uncertainty.

35

36 **Key words:** QMRA; SARS-CoV-2; Toilet flushing; Indoor drainage system; Aerosol  
37 transmission

## 38 **1. Introduction**

39 The ongoing COVID-19 pandemic<sup>1</sup> caused by severe acute respiratory syndrome  
40 coronavirus 2 (SARS-CoV-2) has had a profound impact on human society and the world  
41 economy<sup>2-3</sup>. Despite the time and money invested in COVID-19 research and medical  
42 treatments around the world<sup>4-8</sup>, at the time of this writing, the diverse routes of transmission and  
43 effective treatment methods for this disease are still unclear. The fecal-oral transmission of  
44 SARS-CoV-2 has been a concern<sup>9</sup> since the first detection of SARS-CoV-2 RNA from patients'  
45 feces<sup>10</sup>. However, the infectivity of SARS-CoV-2 in feces and its hazard to human health is an  
46 ongoing debate although high concentrations of viral RNA have been found in both patient's  
47 feces<sup>11-13</sup> and in human sewage<sup>14</sup>. Only a handful of papers<sup>10, 15-17</sup> reported the isolation of  
48 infectious viruses from feces on human tissue culture. The most recent report by Zang et al.<sup>13</sup>  
49 provides evidence of SARS-CoV-2 replication in human small intestine but shows that most of  
50 the viruses are inactivated by simulated colonic fluid. This report explains the low frequency of  
51 viral isolation from fecal samples but it does not rule out the presence of infectious viruses in  
52 the patients' feces as demonstrated by the other studies.<sup>10, 15-17</sup> The rate of inactivation as the  
53 viruses passing through colon is likely dependent on time and protective effect of fecal material  
54 in colon. A fraction of viruses may survive the passage. Another contributor for the low  
55 frequency of fecal viral isolation on tissue culture may be due to the difficulties of measuring  
56 infectious virus in feces. Multiple purification steps are necessary to remove bacteria and other  
57 interferences before the samples can be loaded onto cell cultures. Such purification steps  
58 perhaps can inactivate or remove SARS-CoV-2. The methodological challenges can result in  
59 the uncertainties of the number of infectious virus in feces. However, based on what we know

60 so far, the hazard of SARS-CoV-2 in feces seems likely to be real.

61 One of the possible transmission routes of fecal derived SARS-CoV-2 is through aerosols  
62 generated from toilet flushing and through indoor plumbing in multi-unit apartment buildings.  
63 The public concern was heightened by a report of high concentrations of SARS-CoV-2 virus in  
64 the aerosols of toilet rooms in two Wuhan hospitals<sup>18</sup>. Toilet flushing may release virus-laden  
65 aerosols and result in exposure<sup>19-20</sup> of healthy individuals sharing the same bathroom.  
66 Furthermore, the commonly known sewer smell in bathrooms of multi-unit apartment building  
67 is suspected to be due to aerosols drawn in from the building's main sewer pipe<sup>19,21</sup>, which may  
68 contain viruses from neighbors' toilets. The massive 2003 SARS outbreak in a condominium  
69 complex in Hong Kong, known as Amoy Gardens is still a fresh memory among many. The  
70 Amoy Gardens outbreak caused by SARS-CoV-1, a close relative of SARS-CoV-2, resulted in  
71 321 cases of infection in the condominium complex. Investigations by the authority attributed  
72 the transmission to the indoor plumbing that drew contaminated aerosols from the patient's  
73 toilet through the main sewer pipe connecting to different units in the same building<sup>19,22-23</sup>.

74 In the last 20 years, researchers have investigated transmission risks from indoor plumbing  
75 and ventilation systems to provide recommendations for building construction and  
76 maintenance<sup>19, 22</sup>. Notably a number of studies have investigated the risk of *Legionella*  
77 transmission through indoor plumbing that delivers potable water or cooling water in multi-unit  
78 apartment buildings<sup>24-26</sup>. Building drainage systems in multi-unit apartment buildings are  
79 commonly served by a main sewer pipe, called a soil-stack (Fig. 1). Toilet flushing pushes  
80 human waste through the soil-pipe to the building's main sewer soil-stack before leaving the  
81 building. However, viruses in feces can attach to the pipe wall and be present in sewer gas  
82 (aerosol) long after the waste has left the building. According to a recent laboratory decay study,

83 SARS-CoV-2 can remain infective on metal and plastic surfaces for hours (the median half-life  
84 is around 13 hours on stainless steel and 16 hours on plastic surface) and has a median half-life  
85 of 2.7 hours in aerosol at 20°C<sup>27</sup>. The building's main sewer soil-stack is connected to the floor  
86 drains and drains for sink, shower, and bathtub through a P-trap (Fig. 1). In normal situations,  
87 the P-trap retains a little bit of water after each use of the appliance. The water serves as a  
88 barrier to block the smell and aerosol from the main sewer pipe. When water in the P-trap  
89 evaporates, aerosols from the main sewer pipe can be drawn directly to individual bathrooms  
90 (commonly known as sewer smell in bathroom).

91 This study addresses the concerns of the aerosol generation from toilet flushing and their  
92 persistence in building drainage system<sup>28-29</sup> using a quantitative microbial risk assessment  
93 (QMRA) for SARS-CoV-2 infection. Two possible transmission scenarios are analyzed: 1)  
94 inhalation of aerosols from toilet flushing of patient feces by a healthy person sharing the toilet  
95 room; and 2) inhalation of contaminated aerosols from the main sewer pipe entering the  
96 bathroom through a faulty floor drain by a neighboring resident. SARS-CoV-2 viral loads in  
97 human feces were collected from emerging literature reporting fecal viral loads<sup>11-12, 16, 18, 30</sup>. To  
98 compare and supplement the SARS-CoV-2 transmission model, SARS-CoV-1 data that caused  
99 the SARS outbreak in 2003 were also compiled from literature. SARS-CoV-2 exhibits long  
100 infectivity in aerosols, which is similar to SARS-CoV-1<sup>27</sup>. The similarities in genome  
101 sequences, human cell receptor for viral entry, and the environmental persistence between  
102 SARS-CoV-2 and SARS-CoV-1<sup>27</sup> suggest that biological parameters for SARS-CoV-1 may be  
103 used as substitutes for SARS-CoV-2 in the absence of the SARS-CoV-2 specific data for risk  
104 quantification. In the absence of data on SARS-CoV-2, data on SARS-CoV-1 may be the best  
105 proxy.

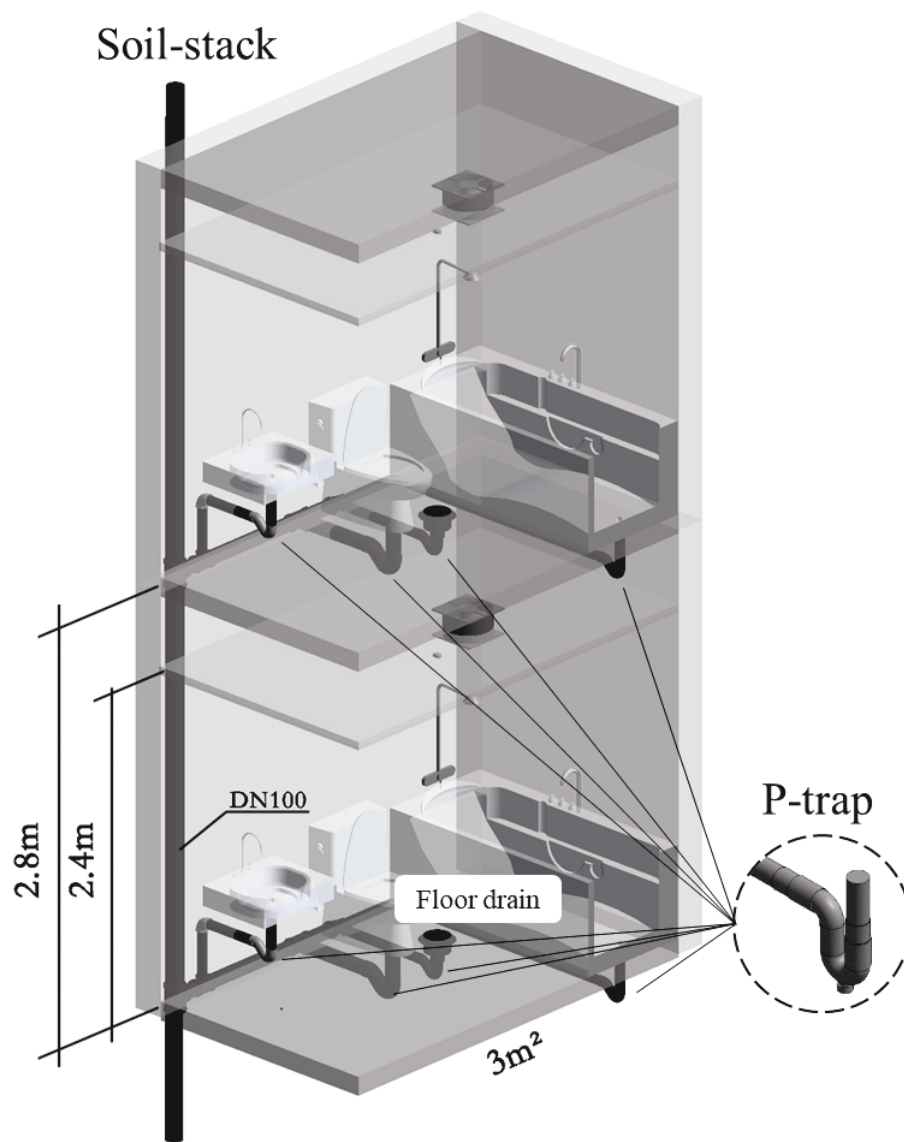

106

107

Figure 1. Illustration of indoor drainage in a multi-unit apartment building.

## 108 **2. Materials and Methods**

### 109 *2.1 Viral Concentration in Toilet Water and Aerosols*

110 Many studies reported the detection of SARS-CoV-2 in COVID-19 patients' feces<sup>11-12, 16,</sup>  
111 <sup>18, 30-33</sup>. At the time of this analysis, only a handful of the studies quantified viral load in human  
112 feces using qPCR<sup>11-12, 16, 30</sup>. Pan et al.<sup>30</sup> reported 9 of 17 positive samples with a range of viral  
113 concentrations between  $10^3$  and  $10^5$  genome copies (gc) of viral RNA/mL of liquid stool sample  
114 (Table S1). The viral load varied over the course of the disease but was within 2 orders of  
115 magnitude. Wolfel et al.<sup>11</sup> reported positive detection in 68 of 81 samples over 21 days for  
116 multiple COVID-19 patients. The SARS-CoV-2 concentrations ranged between  $10^2$  and over  
117  $10^7$  gc/ gram of feces (Table S1). More recently, Zheng et al.<sup>12</sup> followed patients for 60 days  
118 and detected 55 positive samples among 93 samples tested and reported the concentration in the  
119 range of less than  $10^2$  and over  $10^8$  gc/mL of feces (Table S1). Xiao et al.<sup>16</sup> followed a single  
120 patient and quantified the viral load in feces by qPCR but used a standard curve based on  
121 known plaque forming unit (pfu). The viral load was expressed as pfu equivalence /mL of feces  
122 but indicated that fecal viral load does not necessarily imply infectivity.

123 The raw data reported in Pan et al.<sup>30</sup> were provided to this study by the authors upon  
124 request. Individual data points from each of the other three reports were extracted from  
125 published figures using GetData Graph Digitizer<sup>34</sup>. In addition, a SARS-CoV-2 concentration of  
126  $19 \text{ gc/m}^3$  of air measured directly in the aerosol from a hospital toilet room was also included in  
127 the analysis<sup>18</sup>. The data described above are compiled in Table S1 and the viral concentration in  
128 aerosols was assumed to be produced solely from flushing patients' feces down the toilet.

129 To compare and contrast SARS-CoV-2 viral load in feces, we also searched and compiled  
130 data for SARS-CoV-1. As shown in Table S1, SARS-CoV-1 viral loads varied more

131 significantly over the course of disease according to three different studies<sup>35-37</sup>. The  
132 SARS-CoV-1 concentration expanded over 6 orders of magnitude among different individuals  
133 and at different stages of disease.

134 Note that the viral concentration was reported as liquid volume of feces except in the study  
135 by Wolfel et al.<sup>11</sup>, in which viral RNA gc/gram was given (Table S1). Wolfel et al.<sup>11</sup> indicated  
136 that the COVID-19 patients included in the study only had very mild symptoms and diarrhea  
137 was uncommon. To compile the data set, the values in per gram of feces were transformed to  
138 values in per mL using a fecal density of 0.97 g/mL<sup>38</sup>. The fecal viral concentration for both  
139 SARS-CoV-2 and SARS-CoV-1 were plotted in histograms and fitted with a cumulative  
140 density function curve shown in Fig. 2. The negative detections in each report were treated as  
141 below the lowest detection limit of 1.95 log<sub>10</sub>gc/mL by qPCR assay (Table S2). The values  
142 were generated by randomly sampling a uniform distribution U(0,1.95) for the fraction of  
143 negative detection reported (Fig. 2). Similarly, the below detection values for SARS-CoV-1  
144 data were generated using U(0,0.35).

145 The three data points from Xiao et al.<sup>16</sup> was not included in the SARS-CoV-2 data  
146 distribution curve because they were expressed as pfu/mL. Instead a triangular(2.52, 2.97, 3.37)  
147 distribution was used to capture the range of viral load from this report (Table S2). The only  
148 direct toilet room aerosol measurement of 19 gc/m<sup>3</sup> air was used as a single point estimate in  
149 risk analysis to represent an event as “aerosol measurement”.



150

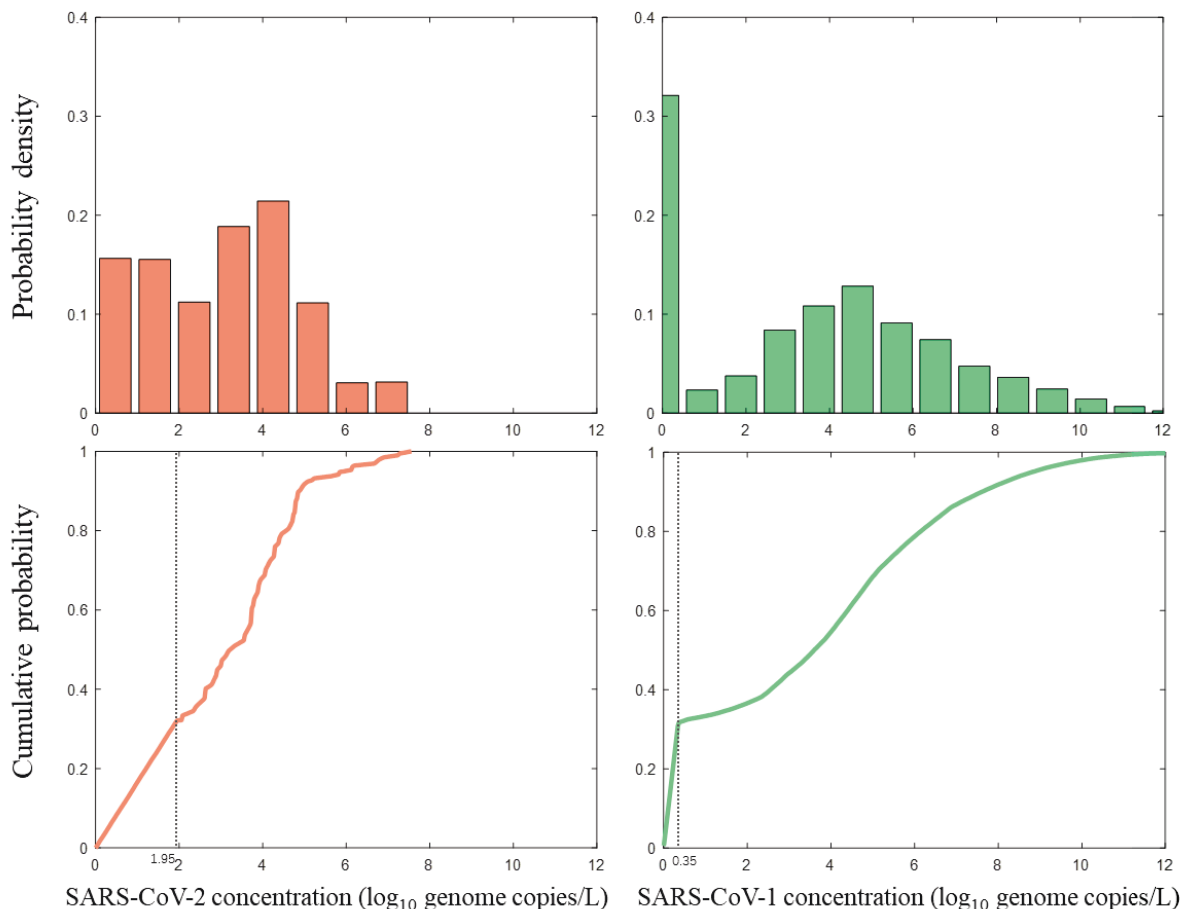

152

153 Figure 2. Histogram plots and cumulative density function curves of SARS-CoV-2 and  
154 SARS-CoV-1 viral loads in human feces (see Table S1 and S2 for data source). Note that the  
155 left side of cumulative distribution curve includes negative detection data from each report,  
156 which was presented as randomly generated data points using uniform distribution from zero to  
157 lower detection limit (dotted vertical line).

158 An empirical distribution of human fecal volume (range 82 to 196mL, mean 135mL) per  
159 day<sup>38</sup> and a uniform(3.78, 6.00) distribution of flushing water<sup>39</sup> were used to estimate the  
160 concentration of virus in toilet water after defecation. The fraction of the infectious  
161 SARS-CoV-2 among reported genome equivalent viral RNA in feces is an important

161 uncertainty. Previous studies of SARS-CoV-1 reported a wide range of conversion factor for  
162 viral genome number to infections unit (pfu), from 360:1 to 1600:1<sup>40-41</sup>. To include the  
163 uncertainty, a triangular(360, 980, 1600) distribution was used to capture the variability of this  
164 parameter (Table S2). Note that this conversion was not applied to the data reported by Xiao et  
165 al.<sup>16</sup> since the fecal load was presented as pfu/mL. In the toilet, the patient's stool was assumed  
166 to be completely mixed with flushing water. Thus, viral concentration in the flushing water  
167 after defecation ( $C_{fw,gc,v}$ , in gc/mL) is calculated using equation 1:

$$168 \quad C_{fw,gc,v} = C_{f,gc,v} \cdot \frac{V_f}{V_f + V_{fw}} \quad (1)$$

169 where  $C_{f,gc,v}$  is the concentration of virus in feces (gc/mL),  $V_f$  is the volume of human  
170 feces per flush (mL), and  $V_{fw}$  is the volume of flush water per flush (mL).

171 Viral concentration in the flushing water is then transformed into unit of pfu/L ( $C_{fw,pfu,v}$ )  
172 by equation 2:

$$173 \quad C_{fw,pfu,v} = C_{fw,gc,v} \cdot \frac{PFU}{GC} \cdot 10^{-3} \quad (2)$$

174 where  $\frac{PFU}{GC}$  represents infectious units per viral gc (pfu/gc), and  $10^{-3}$  is the unit  
175 conversion factor from per milliliter to per liter.

176 Aerosols generated from toilet flushing were assumed to contain the same viral  
177 concentration as the toilet water post defecation. The detailed data and assumptions are  
178 presented in Table S2.

## 179 **2.2 Exposure Assessment for Aerosol Inhalation**

180 Two exposure scenarios were considered to represent the generic living conditions in a  
181 multi-unit apartment building. The first scenario considers a shared bathroom by two suitemates  
182 in the same apartment suite. One resident is a COVID-19 patient under self-quarantine in

183 his/her own room. The second scenario considers a COVID-19 patient under self-quarantine in  
184 an isolated apartment in the building. A neighbor in the apartment one floor below the patient's  
185 apartment shares the main sewer soil-stack and has a floor drain missing water-seal to block the  
186 aerosol from the sewer pipe (Fig. 1).

### 187 *2.2.1 Toilet-flushing scenario*

188 Under scenario 1, the aerosol concentration in the toilet room generated after a toilet  
189 flushing was adopted from a study by O'Toole et al.<sup>42</sup>. Since the aerosol concentrations were  
190 collected at different heights above the toilet in the original study, we adopted data collected at  
191 a sampling height of 420 mm above the toilet to represent aerosol concentrations inhaled by a  
192 person when using the toilet (Table S3). O'Toole et al.<sup>42</sup> also showed a bimodal distribution of  
193 two median diameter aerosol sizes,  $d_1=0.6 \mu\text{m}$  and  $d_2=2.5 \mu\text{m}$ , at this height<sup>42</sup>. Although several  
194 other studies<sup>43-44</sup> also reported the mass of aerosols generated by toilet flushing, the data were  
195 not comparable with the O'Toole et al.<sup>42</sup> due to different types of toilet and different  
196 measurement approaches. These data were not included in aerosol estimation due to the need  
197 for assumptions of air volume and dispersion rate in the toilet room, which could induce  
198 additional uncertainty.

199 The decay of SARS-CoV-2 in the toilet-generated aerosols was computed using the  
200 half-life of 2.7 hours reported by van Doremalen et al.<sup>27</sup>. The healthy suitemate was assumed to  
201 be exposed to contaminated aerosols once a day between 0 and 2 hours after the patient flushed  
202 the fecal waste using  $U(0,2)$ . The risk of exposure declines with the time after the prior flush  
203 due to viral decay in aerosols.

204 The aerosol deposition efficiencies in human respiratory tract were derived from Heyder's  
205 study<sup>45</sup>, which was reported as a function of particle size and breathing patterns. The aerosol

206 inhalation efficiency was based on an individuals' breathing pattern during light activities<sup>46</sup>.  
207 The duration of exposure for the healthy individual was set using a uniform distribution of 10 to  
208 30 minutes U(10,30) to represent the various activities from urination to defecation and hand  
209 washing in the bathroom.

210 The dose of virus ( $Dose_{tf,v}$ , in pfu/case) inhaled and deposited in the healthy resident's  
211 respiratory tract under the toilet flushing scenario was estimated using equation 3:

$$212 \quad Dose_{tf,v} = C_{fw,pfu,v} \cdot Dose_{a,tf} \cdot Dec_v \cdot MFR_a \cdot Dur_t \quad (3)$$

213 where  $Dose_{a,tf}$  is the mass of aerosol according to median diameter size ( $d_i$ ) deposited in  
214 the exposed person's respiratory tract (L/L of air),  $Dec_v$  is the decay rate of virus in aerosols,  
215  $MFR_a$  is the mean flow rate of air breathed by the exposed person (L of air/min), and  $Dur_t$  is  
216 the time spent in the toilet room each exposure event (min/case). The  $Dose_{a,tf}$  in equation 3  
217 was derived using equation 4:

$$218 \quad Dose_{a,tf} = \sum_{i=1}^2 (C_{a,tf,d_i} \cdot V_{a,tf,d_i} \cdot E_{dep,d_i}) \quad (4)$$

219 where  $C_{a,tf,d_i}$  is the concentration of aerosols in the specific height above toilet after each  
220 toilet flush (# of aerosol/L of air) at range of diameter size ( $d_i$ , in  $\mu m$ ),  $V_{a,tf,d_i}$  is the volume  
221 of spherical aerosol (L/# of aerosol),  $E_{dep,d_i}$  is the deposition efficiency of aerosols according  
222 to size in respiratory tract (unitless). The decay of virus in aerosols was calculated using  
223 equation 5:

$$224 \quad Dec_v = \frac{\int_{t_0}^{t_0+Dur_t} 0.5^{\frac{t}{hl_v}} dt}{Dur_t} \quad (5)$$

225 where  $t_0$  is the interval between the prior toilet flushing of patient's feces and the healthy  
226 suitemate using the toilet room (min), and  $hl_v$  is the half-life of the SARS-CoV-1 or

227 SARS-CoV-2 in aerosol (min) according to van Doremalen et al.<sup>27</sup>. Parameters and assumptions  
228 used are summarized in Table S3.

### 229 2.2.2 Faulty drain scenario

230 In this scenario, aerosols containing virus were assumed to be generated from the same  
231 flushing water and were suspending along the entire sewer soil-stack after the waste passed  
232 through the pipe. The aerosols in the sewer pipe were characterized once again by data from  
233 O'Toole's study<sup>42</sup> for samples collected immediately above the toilet (50 mm). A worst-case  
234 assumption was made that a ventilation fan drew all contaminated aerosols in the soil-stack pipe  
235 (0.1 m diameter and 2.8 m long between two floors) into the toilet room at the apartment  
236 one-story below through a floor drain that is missing the water-seal (Fig. 1). A toilet room size  
237 of 3 m<sup>2</sup> x 2.4 m height, a typical toilet room in Amoy Gardens, was used to calculate the aerosol  
238 concentration. The dispersion of the aerosols in the toilet room was assumed to follow a  
239 Uniform( $\log_{10}0.03,0$ ) distribution.

240 Inhalation of polluted aerosols by the neighbor in the apartment below when using the  
241 toilet was modeled in the same way as the toilet flushing scenario. The dose of viruses through  
242 the faulty drain with no water seal ( $Dose_{fd,v}$ , pfu/event) deposited in the exposed person's  
243 respiratory tract was estimated using the equation 6:

$$244 \quad Dose_{fd,v} = C_{fw,pfu,v} \cdot Dose_{a,fd} \cdot Dec_v \cdot MFR_a \cdot Dur_t \quad (6)$$

245 where  $Dose_{a,fd}$  is the mass of aerosol according to median diameter size ( $d_{fd}$ , in  $\mu m$ )  
246 deposited in the exposed person's respiratory tract (L/L of air) in faulty drain scenario. It was  
247 calculated using equation 7:

$$248 \quad Dose_{a,fd} = (C_{a,fd,d_{fd}} \cdot V_{a,fd,d_{fd}} \cdot E_{dep,d_{fd}}) \cdot Dis_{a,fd} \quad (7)$$

249 where  $C_{a,fd,d_{fd}}$  is the concentration of aerosols suspended in soil-stack pipe (# of

250 aerosol/L of air),  $V_{a,fd,d_{fd}}$  is the volume of spherical aerosol (L/# of aerosol), and  $Dis_{a,fd}$  is  
251 the dispersion rate of aerosol (unitless) in the toilet room. Parameters and assumptions used in  
252 this scenario are also summarized in Table S3.

253 The doses of exposure under different scenarios were compared. The simulated doses from  
254 fecal viral load were also compared with the exposure dose calculated using the SARS-CoV-2  
255 concentration measured directly from the hospital toilet room<sup>18</sup>. Moreover, the model derived  
256 dose for SARS-CoV-1 under faulty drain scenario was compared to the dose estimated by  
257 Watanabe et al.<sup>47</sup> in Amoy Gardens using a back calculation of attack rate and the  
258 dose-response model.

### 259 **2.3 Dose-response Assessment**

260 There has not been a dose-response model developed for SARS-CoV-2 for human or  
261 animals. SARS-CoV-2 shares 79% nucleic acid sequence identity to SARS-CoV-1, and uses the  
262 same cell entry receptor (ACE2) as SARS-CoV-1<sup>48</sup>. Structural analysis revealed SARS-CoV-2  
263 protein binds ACE2 with 10-20 folds higher affinity than SARS-CoV-1, which indicates that  
264 SARS-CoV-2 may be more infectious to humans than SARS-CoV-1<sup>48</sup>. Moreover,  
265 SARS-CoV-2 triggers receptor dependent cell-cell fusion that helps the virus rapidly spread  
266 from cell-to-cell<sup>49</sup>. The basic reproductive values ( $R_0$ ) of COVID-19 at the early stage were  
267 calculated between 2 and 3.5, indicating that infected people on average could infect two to  
268 more than three other people, which was higher than SARS<sup>50</sup>. The effective reproduction  
269 number may be much lower due to less-susceptible hosts such as young adults<sup>4, 51-52</sup>. This  
270 infective pattern of SARS-CoV-2 is highly similar to SARS-CoV-1<sup>53</sup>. Based on the comparative  
271 biological property of the two viruses, we adopted SARS-CoV-1 dose-response model<sup>47</sup> for  
272 SARS-CoV-2. To manage the uncertainty of this model, the probability distribution of  $k$  value

273 in the exponential dose-response model was incorporated in the simulation to determine its  
274 impact on the uncertainty of model output. The normal distribution  $\ln N(6.01, 1.75)$  as originally  
275 reported for SARS-CoV-1 dose-response by Watanabe et al.<sup>47</sup> was used in the simulation.  
276 Moreover, the  $k$  was customized to SARS-CoV-2 by including the enhanced infectivity factor  
277 using uniform distribution  $U(10, 20)$  to capture the 10 to 20 times higher cell-receptor affinity  
278 and viral spread through cells. Since it is currently unclear that the ACE2 receptor binding  
279 affinity would linearly translate to infectivity in doses, this general model was subjected to  
280 sensitivity analysis. Therefore, the same dose-response model (equation 8) for SARS-CoV-1  
281 and SARS-CoV-2 was used with the different best fit  $k$  value.

$$282 \quad P_i = 1 - \exp\left(-\frac{Dose}{k}\right) \quad (8).$$

283 The parameters used in the dose-response assessments are presented in (Table S4).

#### 284 **2.4 Risk Characterization**

285 To estimate the risk of developing COVID-19 by the suitemate or the downstairs neighbor,  
286 we assume a once-a-day encounter rate of polluted aerosols over a 15-day course of disease  
287 (Table S4). The estimations were carried out using equation 9 and the illness rate for  
288 COVID-19 was compared to the simulated outcomes for SARS, to provide a relative risk  
289 perspective.

$$290 \quad P_{iE,S} = 1 - \prod_{i=1}^{n=E \times M_s} (1 - P_i) \quad (9)$$

291 Where  $E$  is the extension of the course of COVID-19 assuming 15 days,  $M_s$  is the  
292 frequency of a scenario occurring in a day.

293 Moreover, the aerosol concentration measured directly in the toilet room used by multiple  
294 COVID-19 patients in a Wuhan hospital of 19 genome copies/m<sup>3</sup> air<sup>18</sup> was included in the risk  
295 estimation to represent the worst case scenario of COVID-19 transmission. The risk estimation

296 using data from Xiao et al.<sup>16</sup>, where the fecal viral shedding was presented as pfu/mL, was  
297 presented separately.

## 298 ***2.5 Monte Carlo Simulation and Sensitivity Analysis***

299 The pseudo-algorithm information flow is shown in Figure S1. The input parameters were  
300 randomly sampled from their established probability distributions. 100,000 iterations of each  
301 output parameter were computed to ensure the distributions reach a steady state.  
302 Reproducibility of the outputs is examined by a variation of less than 1%<sup>54</sup>. All computations  
303 were carried using MATLAB R2019b<sup>55</sup>.

304 A sensitivity analysis was conducted to determine which model inputs were the most  
305 influential contributors to the predicted illness risk. The rank of importance was introduced  
306 through incorporation of parameter sensitivity with the relative order of uncertainty to assess  
307 the confidence in the model. The importance factor ( $I$ ) contributing to illness risk for each input  
308 parameter (unitless) was calculated using equation 10:

$$309 \quad I = S \cdot R \quad (10)$$

310 where  $S$  is the sensitivity of illness risk related to the input parameter, and  $R$  is the  
311 coefficient of variation of the input parameter.

312  $S$  was assessed by a local sensitivity analysis method to represent the variability  
313 propagation of input parameters through modeling of the health risk. The true means of  
314 distributions (or the values of point-estimates) were adopted as baseline point values for each  
315 input parameter and output variable. Then the baseline input parameter  $P_m$  value was  
316 decreased by 10%, and a differential value for output variable  $X_m$  was calculated as shown in  
317 equation 11:

$$318 \quad S = \frac{\left| \frac{\Delta X_m}{X_m} \right|}{\left| \frac{\Delta P_m}{P_m} \right|} \quad (11)$$



319 where  $X_m$  is the mean value of the original output variable distribution,  $\Delta X_m$  is the  
320 difference in means between the original output distribution and the altered output distribution,  
321  $P_m$  is the original baseline point value, and  $\Delta P_m$  is the difference between the original baseline  
322 value and the altered value.

323  $R$  was incorporated to represent the uncertainty of input parameter distribution, and was  
324 calculated using equation 12:

$$325 \quad R = \frac{P_{std}}{P_m} \quad (12)$$

326 where  $P_{std}$  is the standard deviation of the input parameter.

327

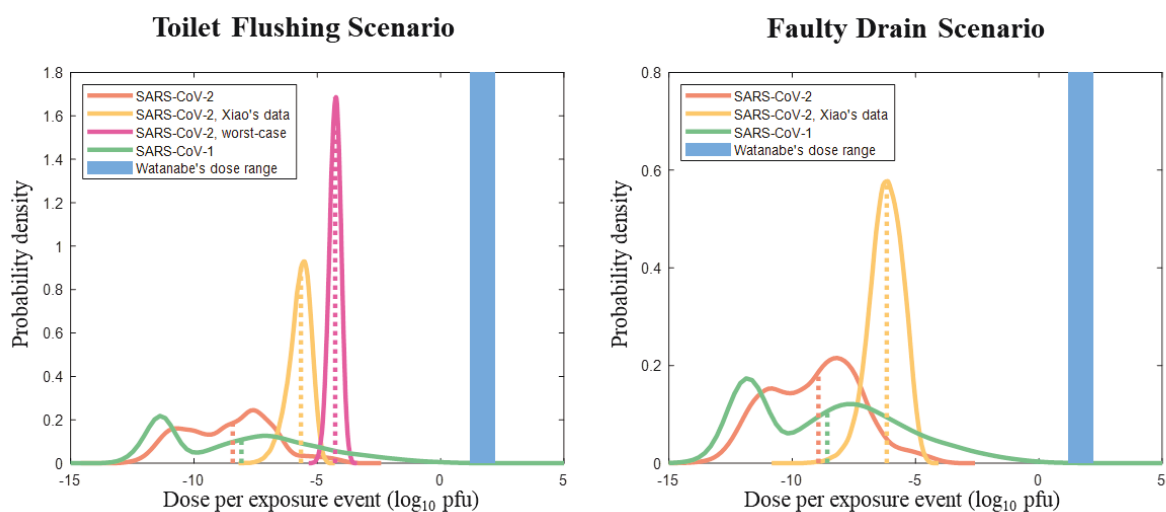

328

329 Figure 3. Distribution plots showing doses of SARS-CoV-2 and SARS-CoV-1 per  
330 exposure event, respectively, estimated using different scenarios and data source. SARS-CoV-2  
331 worst-case is from the aerosol measurement from Wuhan hospital toilet room. Dotted lines  
332 represent the medians of distributions. The vertical blue bar is the range of doses estimated by  
333 Watanabe et al. for Amoy Gardens' incident.

334

### 335 **3. Results and discussion**

#### 336 *3.1 Comparison of Exposure Dose Under Different Scenarios*

337 The exposure doses of SARS-CoV-1 and SARS-CoV-2 per event under different scenarios  
338 are presented in Fig. 3. The simulated doses based on fecal load had a bimodal distribution  
339 because of the inclusion of non-detectable results. The median values for SARS-CoV-1 and 2  
340 were similar, in the range of 1.15 to 8.45 x 10<sup>-9</sup> pfu per exposure event (see Table S5 for  
341 summary descriptors). However, comparing the two viruses, SARS-CoV-1 had a wide range of  
342 exposure dose with a long flat tail (95<sup>th</sup> percentile is 1.58 x 10<sup>-3</sup> pfu for toilet flushing scenario)  
343 on the right side of the distribution curve (Fig. 3 and Table S5).

344 Using fecal load data reported by Xiao et al.<sup>16</sup> (in pfu/mL) to calculate the exposure dose  
345 shifted the median exposure dose to the right by over 2 to 3 log<sub>10</sub> units (Fig. 3, Table S5).  
346 However, this exposure dose was likely an overestimation of infectious SARS-CoV-2 because  
347 the authors of the fecal shedding study indicated that the pfu equivalent numbers reported do  
348 not indicate infectivity number<sup>16</sup>. It is important to note that the pfu equivalent presented in  
349 Xiao et al. is not the same as the viral infectious unit presented elsewhere in the study. The  
350 worst case scenario of exposure to SARS-CoV-2 was represented by exposure to an aerosol  
351 concentration measured directly in the hospital's toilet room (Fig. 3). The median exposure  
352 dose of this scenario was 5.34 x 10<sup>-5</sup> pfu per exposure event (Table S5).

353 There is a dramatic mismatch when comparing the exposure dose estimated based on any  
354 of the scenario with the exposure dose calculated by Watanabe et al.<sup>47</sup>. Watanabe et al. based  
355 their estimation on the attack rate in Amoy Gardens and the dose-response relationship derived  
356 using an animal model (Figure 3). The explanations for the mismatch are complicated and may  
357 include the following reasons.

358 1) Watanabe et al.<sup>47</sup> assumed that all infections in Amoy Gardens were resulting from the  
359 faulty drainage system in the building and calculated the attack rate based on estimated number  
360 of residents per unit. This attack rate may be an overestimation because other modes of  
361 transmission (i.e. surface contact and in person transmission in shared elevators or space)  
362 besides aerosols through faulty drains were not considered<sup>56-57</sup>.

363 2) Our aerosol concentrations are underestimated by several orders of magnitude. Since the  
364 initial infectious viral load (pfu) in feces is a sensitive input parameter that influences the  
365 aerosol dose in the toilet room, the major uncertainty could be from the conversion of viral  
366 genome copy to infectious unit. We used SARS-CoV-1 as the surrogate to get the conversion  
367 factor from laboratory studies by different researchers<sup>40-41</sup>. We used triangular distribution to  
368 derive the range. The outcomes of the conversion were ~100 times lower than the report  
369 presented by Xiao et al.<sup>16</sup> who used pfu equivalent directly as the standard curve in the  
370 estimation of viral load in feces. Another source of underestimation is from the literature reports  
371 of fecal loading among COVID-19 patients. The data collected in this study include a total of  
372 191 human fecal samples (exclude the 3 samples from Xiao et al.<sup>16</sup>) at different stage of disease  
373 development. It represents the state of knowledge at the time of this analysis.

374 3) The dose-response model derived from animal study and used by Watanabe et al.<sup>47</sup> in  
375 model fitting is an overestimation of the infectious dose of the SARS-CoV-1. Based on the  
376 animal trial study<sup>58-59</sup>, the SARS-CoV-1 requires higher dose of infectious than HCoV-229E,  
377 the common human cold virus. The SARS-CoV-1 dose-response was investigated using  
378 genetically modified mice, which may not be a good representation of human infection rate.

379 Based on these above analyses, the unmatched dose in aerosol exposure between Watanabe  
380 et al.<sup>47</sup> and our model prediction cannot be easily resolved. The uncertainty analysis that

381 incorporates the sensitivity with the coefficient of variation of the input parameter (as presented  
382 in the section 3.3) weighs the importance of the input parameters to the model outcomes. This  
383 first attempt at the risk analysis of the specific scenario offers a starting point for looking into  
384 data collection needs.

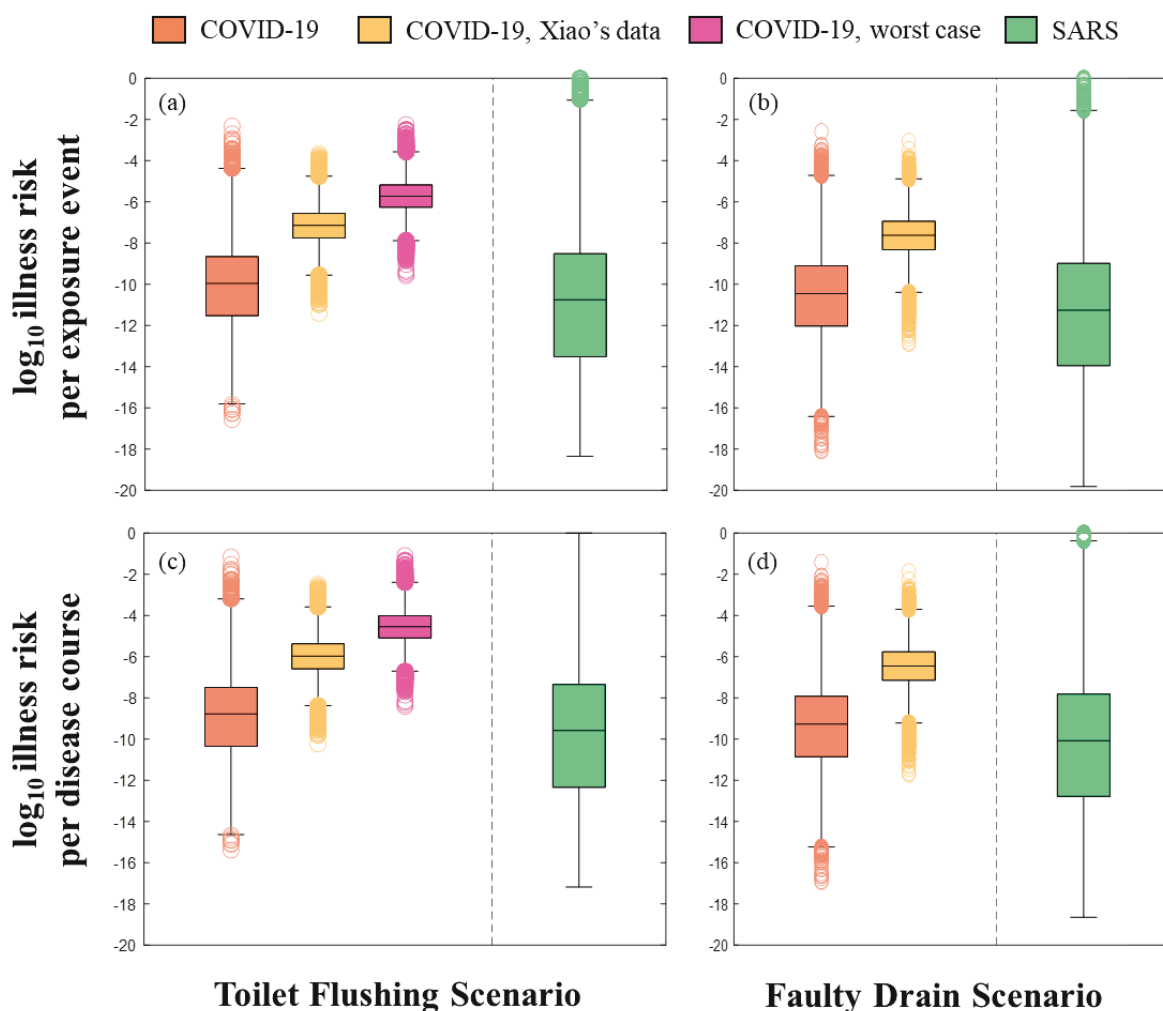

385

386 Figure 4. Box-and-Whiskers plots showing COVID-19 and SARS illness risks per exposure  
387 event (a & b) and per disease course (c & d) using data collected for SARS-CoV-2 and  
388 SARS-CoV-1, respectively. Each box represents the 25<sup>th</sup>, median (50<sup>th</sup>), and 75<sup>th</sup> percentile  
389 values of the distribution, where the whiskers extend  $1.5 \times (75^{\text{th}} \text{ percentile value} - 25^{\text{th}}$   
390 percentile value) from each end of the box.

### 391 **3.2. Risk Quantification Per Exposure Event and Per Course of Disease**

392 Fig. 4 shows the outcomes of risk estimation for different scenarios. The median  
393 COVID-19 illness risk for a single day exposure is  $1.11 \times 10^{-10}$  and  $3.52 \times 10^{-11}$  for toilet  
394 flushing (Fig 4a and Table S6a) and faulty drain (Fig 4b and Table S6a) scenario, respectively.  
395 These values are nearly one log higher in comparison with the SARS illness risk predicted  
396 using SARS-CoV-1 fecal loading estimation, which have a median value of  $1.75 \times 10^{-11}$  for  
397 toilet flushing and  $5.5 \times 10^{-12}$  for the faulty drain scenario (Table S6a). However, there is a large  
398 variability of predicted risk for SARS with the 95<sup>th</sup> percentile risk of  $5.28 \times 10^{-6}$  and  $1.82 \times 10^{-6}$   
399 for toilet flushing and faulty drain scenario, respectively. The corresponding 95<sup>th</sup> percentile  
400 risks for COVID-19 are 1 to 1.5 log lower.

401 Xiao et al.'s fecal load data<sup>16</sup> predicted much higher risks for both scenarios with the  
402 median risk in the order of  $10^{-8}$  and 95<sup>th</sup> percentile risk in the order of  $10^{-6}$  (Fig. 4 and Table  
403 S6a). The estimates for exposure to contaminated aerosols in the hospital toilet room yielded a  
404 median risk value of  $1.9 \times 10^{-6}$  and 95<sup>th</sup> percentile risk of  $3.85 \times 10^{-5}$  for each single exposure  
405 (Table 6a).

406 When multiple exposures were considered over the 15-day course of the disease, assuming  
407 once a day exposure frequency, the estimated risk of COVID-19 increased by approximately  
408 one log for all scenarios (Fig 4c,d and Table S6b). Again, these values were about one log  
409 higher than median illness risks for SARS under the same scenarios but SARS outcomes  
410 spanned a much greater range (Fig. 4 c, d and Table 6S). The worst case scenario, exposure to  
411 aerosol in a hospital toilet room used by multiple patients, predicted the high end of COVID-19  
412 risk for toilet flushing scenario at  $5.78 \times 10^{-4}$  (95<sup>th</sup> percentile). Comparing risks from the toilet  
413 flushing with the faulty drain scenario, it's obvious that direct exposure to aerosols generated

414 from toilet flushing had greater risk than exposure to aerosols entered from a faulty drain in the  
415 building (Fig. 4).

416 These risk estimates are at odds with the conclusion of Amoy Gardens' investigation,  
417 where the epidemiological study presented a very different picture, a much higher attack rate  
418 from the faulty drain scenario. The uncertainties of a number of input parameters in the model  
419 are worthy of analysis to offer better insights into the discrepancies observed from the two  
420 investigations. These input parameters include the concentration of viruses in the feces, the  
421 conversion factor from genome equivalent of virus to infectious unit, the daily fecal volume, the  
422 toilet flushing water volume, the aerosols generated during toilet flushing, the duration of  
423 exposure in the toilet room, the viral decay and the best fit parameter for dose-response model.

### 424 ***3.3 Sensitivity Analysis and Model Uncertainties***

425 The analyses for model uncertainties were assessed using the joint estimation of local  
426 sensitivity of each parameter and the coefficient of variant for the parameter to evaluate the  
427 relative order of uncertainty. Note that the analysis was only carried out for models starting  
428 with genome equivalent SARS-CoV-2 fecal loadings. The single aerosol measurement from the  
429 hospital toilet room was not a good representation of the normal living condition in the  
430 multi-unit apartment building and only presented here as the worst case scenario. The results  
431 showed that the concentration of genome equivalent virus in toilet flushing water ( $C_{fw,gc,v2}$ )  
432 was the most important input parameter in the risk estimation for both scenarios (Fig. 5).  
433 Variability of this parameter contributed to 48% of the variability of model outcome and  
434 represented the most uncertainty. The conversion factor (PFU/GC) that bridges the genome  
435 copies of virus to pfu of the infectious virus, in comparison, was only a minor contributor (1 to  
436 2% of variability) to the overall model outcome (Fig. 5). The concentration of aerosols in the

437 toilet room ( $C_{a,tf,d_i}$  and  $C_{a,fd,d_{fd}}$ ) had a more important role than the genome conversion  
438 factor and attributed to 4 and 5% of the variability in the model output. Unique to the faulty  
439 drain scenario, the aerosol dispersion rate ( $Dis_{a,fd}$ ) from the drain to the toilet room was a  
440 sensitive and uncertain parameter, which contributed to 7% of the variability in the risk  
441 outcome. The fecal volume ( $V_f$ ), time spent in the toilet room ( $Dur_t$ ), the SARS-CoV-2 decay  
442 half life ( $hl_{v2}$ ), and time delay ( $t_0$ ) after the prior toilet flushing all contributed to 2% of the  
443 variability in the model outcome and were less important in comparison with the concentration  
444 of the virus in the flush water ( $C_{fw,gc,v2}$ ). Aside from the factors influencing the exposure risk,  
445 the dose-response best fit parameter  $k_{v2}$  in the exponential dose-response model was the  
446 second most important contributor to the variability of the illness risk estimation. 37% of  
447 variability in illness estimation was due to this parameter in the toilet flushing scenario and 34%  
448 in the faulty drain scenario.

449 We initially expected the conversion factor from genome copy virus to infectious virus pfu  
450 was a major source of model uncertainty since determining the concentration of infectious  
451 SARS-CoV-2 in the fecal samples had been challenging<sup>11</sup>. The above analyses showed,  
452 however, the wide range of the viral load in the fecal shedding played an important role. In the  
453 effort of the data collection, we focused on literature that provided quantitative analysis of fecal  
454 loading in patients at different stage of the disease development and from different regions. We  
455 also included data reported as non-detection by setting the lower detection limit as the upper  
456 bound to generate estimations using a uniform distribution between zero and the detection limit.  
457 The SARS-CoV-2 data compiled here represent the state of knowledge and are comparable with  
458 SARS-CoV-1 data, which served as a proxy for the new virus.

459

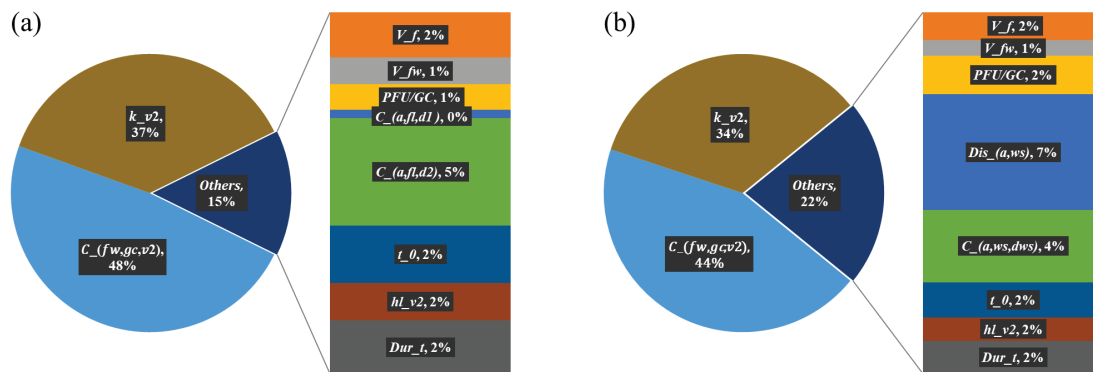

460

461 Figure 5. Ranked importance analysis of model outcomes. See manuscript for parameter  
 462 descriptions.

463

464 To further assess the confidence of fecal viral load among COVID-19 patients, we  
 465 compared the estimated total viral load from all COVID-19 cases (15-day accumulated cases) in  
 466 a sewage treatment plant's service area with the reported concentration of SARS-CoV-2 in  
 467 sewage. The back-of-the-envelope calculation was carried out using the City of New York  
 468 COVID-19 cases reported during their peak outbreak. The case numbers were collected in  
 469 Newtown Creek Wastewater Treatment Plant (NCWTP) service area, including Manhattan,  
 470 Brooklyn and Queens<sup>60</sup>. The case numbers were multiplied by the fecal loading rate and divided  
 471 by the influent volume of raw sewage to NCWTP. The details of the calculation and outcomes  
 472 are presented in the supporting materials and Figure S2. The analysis showed that based on  
 473 reported cases and fecal viral load, the median concentration of SARS-CoV-2 was estimated to  
 474 be  $1.25 \log_{10} \text{gc/L}$  of raw sewage without including viral decay during transport from households  
 475 to NCWTP (Table S7). If assuming reported cases were only 50% of the total number of cases  
 476 in the community (due to underreporting, asymptomatic and pre-symptomatic cases), the  
 477 estimated concentration of SARS-CoV-2 would only increase to  $1.55 \log_{10} \text{gc/L}$ . Even assuming  
 478 50% of all residents in the plant service area were COVID-19 patients and shed virus in the



479 feces, the median concentration of SARS-CoV-2 was still in the range of  $3.1\log_{10}\text{gc/L}$  of raw  
480 sewage. In comparison with the reports of SARS-CoV-2 concentration in sewage from different  
481 municipal sewage treatment plants (median value of  $5.23\log_{10}\text{gc/L}$ ), the estimates based on  
482 fecal loading were much lower (Figure S2 and Table S7). This result suggests that the fecal  
483 loading is either underestimated or sewage SARS-CoV-2 concentration is several orders  
484 overestimated. The underestimation of fecal viral load could be due to the methodological  
485 challenges relating to sample extraction and purification of viruses for qPCR. Since the  
486 uncertainty of this parameter plays a key role in the risk estimation, future data in this area will  
487 no doubt improve the confidence in the risk estimation.

488       Regardless of the contribution of the conversion factor to model variability, the infectivity  
489 of the viruses shed in feces is a critical factor to establish the hazard in discussion. At the time  
490 of this writing, there are two sides of the expert opinions regarding the infectivity of  
491 SARS-CoV-2 in feces. One side believes that viruses shed in feces are mostly inactivated by  
492 colonic fluid<sup>13</sup>, therefore, there is low or no hazard from fecal shed virus. So far, there has not  
493 been any direct evidence to support fecal transmitted infection in human or in animal model for  
494 either SARS-CoV-2 or SARS-CoV-1. The conclusion from the Amory Gardens investigation  
495 was challenged by previous reports<sup>56-57</sup>. The other side of the opinion points to the successful  
496 isolation of infectious virus from fecal samples from the handful of presence and absence  
497 studies to support the hypothesis of fecal-oral transmission<sup>10, 15-17</sup>. Several reports also indicate  
498 that viral shedding in feces long after patients recovered from COVID-19 and tested negative  
499 for SARS-CoV-2 in respiratory samples. They suggested that prolonged viral shedding could  
500 pose repeated exposure risks to others even after the patient has recovered from disease<sup>32</sup>. In  
501 addition to the case report of Amoy Gardens for SARS-CoV-1 transmission, two recent

502 governmental reports from China concluded that fecal exposure was the likely source of  
503 COVID-19 transmission. One was a press release of the Infectious Disease Control Authority in  
504 the City of Guangzhou, China, which pin-pointed the COVID-19 patient feces as the source of  
505 infection of three families residing in the floor below a COVID-19 patient<sup>61</sup>. The second was a  
506 report by Beijing Center for Disease Control and Prevention identifying that an isolated incident  
507 of a COVID-19 case was linked to a known cluster of outbreak through a visit to a public  
508 bathroom<sup>62</sup>. More research is needed to understand infectious potential of feces.

509 We adopted the genome copy to infectious unit conversion of SARS-CoV-1 reported in the  
510 lab experiments as a proxy for SARS-CoV-2. It is important to point out that the SARS-CoV-1  
511 used in these experiments was not derived from fecal samples<sup>40-41</sup>. They were lab viral cultures,  
512 and the relationship between genome copies and infectious units depended on the methods for  
513 virus preparation, the storage condition and time delay before the assay. If we believe the  
514 colonic fluid can effectively inactivate SARS-CoV-2, the conversion factor adopted from lab  
515 cultured viruses could be an overestimation of infectious virus in feces and the final risks. The  
516 conversion factor used in the model covers a range based on the lab experimental outcome but  
517 it may not be the right representation of fecal shed virus. The degree of uncertainty in this factor  
518 may not be adequately represented by the importance analysis. Until further data on infectivity  
519 of SARS-CoV-2 in feces is made available, this is the best proxy for converting genome  
520 equivalent to infectious unit.

521 The aerosol generation during toilet flushing has been well studied<sup>20-21</sup>. Aerosol  
522 concentration varies with types of toilet. The aerosol concentrations presented by O'Toole's  
523 study<sup>42</sup> are the best representation of the low flow toilet commonly installed in the multi-unit  
524 apartment buildings. The importance analyses indicated both aerosol concentration and

525 dispersion in a room could have important impact on the risk outcomes. However, they were  
526 unlikely to change the magnitude of the risk that could match the risk outcome of Amoy  
527 Gardens. In comparison with the direct measurements of aerosols generated by toilet flushing,  
528 the dispersion of aerosols through a faulty drains is less certain. The commonly known sewer  
529 smell only provides indirect evidence for aerosol intake from the main sewer pipe to individual  
530 toilet rooms. We built a uniform distribution for the dispersion rate to capture the variability of  
531 this parameter. Additional research is needed to understand the building drainage system and  
532 aerosol transmission.

533 Human dose-response model for SARS-CoV-2 requires intentionally exposing humans to  
534 known doses of SARS-CoV-2, which is unlikely due to the ethical concerns. Animal models  
535 may be developed in the future as that has been done for SARS-CoV-1. Although there are  
536 remarkable differences between SARS-CoV-2 and SARS-CoV-1 during infection, the disease  
537 development shares similarity, which promotes us to use the SARS-CoV-1 model as the proxy.  
538 Analyses showed that this was a critical parameter of the risk model and contributed to a large  
539 degree of uncertainty in the risk outcome. Adjustment made in the  $k$  through incorporation of  
540 enhanced affinity to cell receptor, did not dramatically increase the risk. The uncertainty was  
541 largely embedded in the original model parameter, where data were pooled from both the  
542 animal model and comparison with other coronavirus including HCoV-229E to generate the  
543 best fit  $k$ . Together with viral load,  $k$  had the biggest impact on risk outcomes. However, even  
544 after removing the uncertainty of the dose-response relationship, the comparison of the  
545 exposure dose estimated by the model still could not resolve the large gap with the dose  
546 estimation from Watanabe et al.<sup>47</sup>. Therefore, this analysis suggests additional routes of  
547 transmission may have contributed to Amoy Gardens outbreak<sup>57</sup>.

548 ***3.4 Implications and Recommendations***

549 The risk estimation presented relatively low median health risks of two viral transmission  
550 scenarios through building drainage system. However, there are large degrees of uncertainty  
551 among several model input parameters. Although uncertainties are inevitable, risk assessment  
552 should always be conducted in an iterative manner that allows refinement of the risk assessment  
553 question(s), key assumptions, and data used in the model. As the first attempt to understand the  
554 risk of a novel virus, we expect the risk analysis to offer the fundamental understanding of  
555 associated risk based on the risk analysis framework. The model and outcomes can be refined in  
556 the later time with the emergence of new data on the property of the virus, human and  
557 environmental interactions.

558 The mismatch of the exposure dose and illness estimation of this study with Amoy  
559 Gardens' report is worthy of further investigation. Although the high end of the risk estimation  
560 does not exclude the transmission scenario, it has a lower possibility or is only under extreme  
561 conditions. The extreme conditions may include a partially stopped up drainage system that can  
562 trap human waste containing virus in the sewer pipe, overloading ventilating fan to draw  
563 contaminated aerosols constantly into the toilet room<sup>19</sup>. Therefore, attentions should be given to  
564 proper maintenance of building drainage systems during the outbreak of aerosol transmitted  
565 diseases.

566 It should be noted that the existing indoor drainage systems, if used and maintained  
567 properly, are able to protect healthy habitants from the possible exposures to pathogens, which  
568 is validated by the lack of more incidents like Amoy Gardens. Recommendations such as  
569 keeping the toilet cover closed while flushing to prevent the aerosols from being splashed into  
570 the air, and a regular inspection of water seals to prevent the aerosols in drainage pipes from

571 being released into the indoor air could be made to further reduce the risk. Such simple habits  
572 could effectively keep habitants from microbial risks associated with the building drainage  
573 system.

574 The toilet flushing and faulty floor drain scenarios are examples of potential hazards of the  
575 fecal contamination derived risk. The aerosolization of fecal derived virus can also be applied to  
576 risk analysis in shared public restrooms since the restroom can be filled with aerosols generated  
577 by multiple toilet flushes within a short time window. The viral concentration in the air could be  
578 significantly higher if there were large numbers of COVID-19 patients or asymptomatic carriers  
579 using the restroom (maybe closer to the direct measurements in the Wuhan Hospital toilet  
580 room). Another potential application is to look into the aerosol generation from aerated sewage  
581 during wastewater treatment process to estimate the risk of personnel working in wastewater  
582 treatment plants.

## 583 **Acknowledgments**

584 Funding for this research is provided by National Science Foundation grant CBET  
585 2027306 and UC Irvine COVID-19 CRAFT research fund to S. Jiang and by Chinese Major  
586 Science and Technology Program for Water Pollution Control and Treatment (No.  
587 2018ZX07110-008) to C. Wang. The authors acknowledge the contribution of original data for  
588 fecal viral loads by Dr. Poon (Pan et al., 2020) and feedback from Y. Ren and H. Wang during  
589 the project development.

590

591 **Supporting Information/Data in Brief:** Data for SARS-CoV-2 and SARS-CoV-1 in human  
592 feces; parameters used in hazard identification, exposure assessment, dose-response and risk  
593 characterization; pseudo-algorithm flow chart for estimating health risks; summary descriptors  
594 for dose estimation, and risk per exposure event and per disease course; comparison of total  
595 fecal derived SARS-CoV-2 load in sewage with SARS-CoV-2 measured directly in sewage.

596

597 **CRedit Statement:** Kuang-wei Shi: data collection, analysis and writing; Yen-Hsiang Huang:  
598 data collection and analysis; Hunter Quon: data collection and editing; Zi-Lu Ou-Yang: data  
599 collection; Chenwei Wang: conceptualization; Sunny Jiang: conceptualization, data collection,  
600 writing, review and editing.

601

## 602 References

- 603 1. WHO Rolling updates on coronavirus disease (COVID-19).  
604 <https://www.who.int/emergencies/diseases/novel-coronavirus-2019/events-as-they-happen>.
- 605 2. Huang, C.; Wang, Y.; Li, X.; Ren, L.; Zhao, J.; Hu, Y.; Zhang, L.; Fan, G.; Xu, J.; Gu, X.;  
606 Cheng, Z.; Yu, T.; Xia, J.; Wei, Y.; Wu, W.; Xie, X.; Yin, W.; Li, H.; Liu, M.; Xiao, Y.; Gao,  
607 H.; Guo, L.; Xie, J.; Wang, G.; Jiang, R.; Gao, Z.; Jin, Q.; Wang, J.; Cao, B., Clinical features  
608 of patients infected with 2019 novel coronavirus in Wuhan, China. *The Lancet* **2020**, *395*  
609 (10223), 497-506.
- 610 3. United-Nations COVID-19 Socio-economic impact.  
611 [https://www.undp.org/content/undp/en/home/coronavirus/socio-economic-impact-of-covid-19.h](https://www.undp.org/content/undp/en/home/coronavirus/socio-economic-impact-of-covid-19.html)  
612 [tml](https://www.undp.org/content/undp/en/home/coronavirus/socio-economic-impact-of-covid-19.html).
- 613 4. Zhou, F.; Yu, T.; Du, R.; Fan, G.; Liu, Y.; Liu, Z.; Xiang, J.; Wang, Y.; Song, B.; Gu, X.;  
614 Guan, L.; Wei, Y.; Li, H.; Wu, X.; Xu, J.; Tu, S.; Zhang, Y.; Chen, H.; Cao, B., Clinical course  
615 and risk factors for mortality of adult inpatients with COVID-19 in Wuhan, China: a  
616 retrospective cohort study. *Lancet* **2020**, *395* (10229), 1054-1062.
- 617 5. Xu, Z.; Shi, L.; Wang, Y.; Zhang, J.; Huang, L.; Zhang, C.; Liu, S.; Zhao, P.; Liu, H.; Zhu,  
618 L.; Tai, Y.; Bai, C.; Gao, T.; Song, J.; Xia, P.; Dong, J.; Zhao, J.; Wang, F.-S., Pathological  
619 findings of COVID-19 associated with acute respiratory distress syndrome. *Lancet Respiratory*  
620 *Medicine* **2020**, *8* (4), 420-422.
- 621 6. Shen, C.; Wang, Z.; Zhao, F.; Yang, Y.; Li, J.; Yuan, J.; Wang, F.; Li, D.; Yang, M.; Xing,  
622 L.; Wei, J.; Xiao, H.; Yang, Y.; Qu, J.; Qing, L.; Chen, L.; Xu, Z.; Peng, L.; Li, Y.; Zheng, H.;  
623 Chen, F.; Huang, K.; Jiang, Y.; Liu, D.; Zhang, Z.; Liu, Y.; Liu, L., Treatment of 5 Critically Ill  
624 Patients With COVID-19 With Convalescent Plasma. *Jama-Journal of the American Medical*  
625 *Association* **2020**, *323* (16), 1582-1589.
- 626 7. Colson, P.; Rolain, J.-M.; Lagier, J.-C.; Brouqui, P.; Raoult, D., Chloroquine and  
627 hydroxychloroquine as available weapons to fight COVID-19. *Int. J. Antimicrob. Agents* **2020**,  
628 *55* (4).
- 629 8. Singhal, T., A Review of Coronavirus Disease-2019 (COVID-19). *Indian J. Pediatr.* **2020**,  
630 *87* (4), 281-286.
- 631 9. Heller, L.; Mota, C. R.; Greco, D. B., COVID-19 faecal-oral transmission: Are we asking  
632 the right questions? *Sci. Total Environ.* **2020**, 729.
- 633 10. Wang, W.; Xu, Y.; Gao, R.; Lu, R.; Han, K.; Wu, G.; Tan, W., Detection of SARS-CoV-2  
634 in Different Types of Clinical Specimens. *JAMA* **2020**.
- 635 11. Wolfel, R.; Corman, V. M.; Guggemos, W.; Seilmaier, M.; Zange, S.; Muller, M. A.;  
636 Niemeyer, D.; Jones, T. C.; Vollmar, P.; Rothe, C.; Hoelscher, M.; Bleicker, T.; Brunink, S.;  
637 Schneider, J.; Ehmann, R.; Zwirgmaier, K.; Drosten, C.; Wendtner, C., Virological assessment  
638 of hospitalized patients with COVID-2019. *Nature* **2020**.
- 639 12. Zheng, S.; Fan, J.; Yu, F.; Feng, B.; Lou, B.; Zou, Q.; Xie, G.; Lin, S.; Wang, R.; Yang, X.;  
640 Chen, W.; Wang, Q.; Zhang, D.; Liu, Y.; Gong, R.; Ma, Z.; Lu, S.; Xiao, Y.; Gu, Y.; Zhang, J.;  
641 Yao, H.; Xu, K.; Lu, X.; Wei, G.; Zhou, J.; Fang, Q.; Cai, H.; Qiu, Y.; Sheng, J.; Chen, Y.;  
642 Liang, T., Viral load dynamics and disease severity in patients infected with SARS-CoV-2 in  
643 Zhejiang province, China, January-March 2020: retrospective cohort study. *Bmj-British*  
644 *Medical Journal* **2020**, 369.
- 645 13. Zang, R.; Gomez Castro, M. F.; McCune, B. T.; Zeng, Q.; Rothlauf, P. W.; Sonnek, N. M.;  
646 Liu, Z.; Brulois, K. F.; Wang, X.; Greenberg, H. B.; Diamond, M. S.; Ciorba, M. A.; Whelan, S.  
647 P. J.; Ding, S., Tmprss2 and Tmprss4 promote SARS-CoV-2 infection of human small  
648 intestinal enterocytes. *Science immunology* **2020**, *5* (47).
- 649 14. Gibney, E., How sewage could reveal true scale of coronavirus outbreak. *Nature* **2020**, *580*  
650 (7802), 176-177.
- 651 15. Xiao, F.; Tang, M.; Zheng, X.; Liu, Y.; Li, X.; Shan, H., Evidence for Gastrointestinal  
652 Infection of SARS-CoV-2. *Gastroenterology* **2020**, *158* (6), 1831-+.

- 653 16. Xiao, F.; Sun, J.; Xu, Y.; Li, F.; Huang, X.; Li, H.; Zhao, J.; Huang, J.; Zhao, J., Infectious  
654 SARS-CoV-2 in Feces of Patient with Severe COVID-19. *Emerging Infect. Dis.* **2020**, *26* (8).
- 655 17. Zhang, Y.; Chen, C.; Zhu, S.; Shu, C.; Wang, D.; Song, J.; Song, Y.; Zhen, W.; Feng, Z.;  
656 Wu, G.; Xu, J.; Xu, W., Isolation of 2019-nCoV from a Stool Specimen of a  
657 Laboratory-Confirmed Case of the Coronavirus Disease 2019 (COVID-19). *China CDC Weekly*  
658 **2020**, *2* (8), 123-124.
- 659 18. Liu, Y.; Ning, Z.; Chen, Y.; Guo, M.; Liu, Y.; Gali, N. K.; Sun, L.; Duan, Y.; Cai, J.;  
660 Westerdahl, D.; Liu, X.; Ho, K.-f.; Kan, H.; Fu, Q.; Lan, K., Aerodynamic Characteristics and  
661 RNA Concentration of SARS-CoV-2 Aerosol in Wuhan Hospitals during COVID-19 Outbreak.  
662 *bioRxiv* **2020**, 2020.03.08.982637.
- 663 19. Mckinney, K. R.; Gong, Y. Y.; Lewis, T. G., Environmental transmission of SARS at  
664 Amoy Gardens. *J. Environ. Health* **2006**, *68* (9), 26-30; quiz 51-2.
- 665 20. Lim, K.-Y.; Hamilton, A. J.; Jiang, S. C., Assessment of public health risk associated with  
666 viral contamination in harvested urban stormwater for domestic applications. *Sci. Total Environ.*  
667 **2015**, *523*, 95-108.
- 668 21. Shi, K.-W.; Wang, C.-W.; Jiang, S. C., Quantitative microbial risk assessment of  
669 Greywater on-site reuse. *The Science of the total environment* **2018**, *635*, 1507-1519.
- 670 22. Chen, C.; Zhao, B.; Yang, X.; Li, Y., Role of two-way airflow owing to temperature  
671 difference in severe acute respiratory syndrome transmission: revisiting the largest nosocomial  
672 severe acute respiratory syndrome outbreak in Hong Kong. *J R Soc Interface* **2011**, *8* (58),  
673 699-710.
- 674 23. Yu, I. T.; Li, Y.; Wong, T. W.; Tam, W.; Chan, A. T.; Lee, J. H.; Leung, D. Y.; Ho, T.,  
675 Evidence of airborne transmission of the severe acute respiratory syndrome virus. *N. Engl. J.*  
676 *Med.* **2004**, *350* (17), 1731-9.
- 677 24. Hamilton, K. A.; Hamilton, M. T.; Johnson, W.; Jjemba, P.; Bukhari, Z.; LeChevallier, M.;  
678 Haas, C. N., Health risks from exposure to Legionella in reclaimed water aerosols: Toilet  
679 flushing, spray irrigation, and cooling towers. *Water Res.* **2018**, *134*, 261-279.
- 680 25. Hamilton, K. A.; Haas, C. N., Critical review of mathematical approaches for quantitative  
681 microbial risk assessment (QMRA) of Legionella in engineered water systems: research gaps  
682 and a new framework. *Environmental Science-Water Research & Technology* **2016**, *2* (4),  
683 599-613.
- 684 26. Schoen, M. E.; Ashbolt, N. J., An in-premise model for Legionella exposure during  
685 showering events. *Water Res.* **2011**, *45* (18), 5826-5836.
- 686 27. van Doremalen, N.; Bushmaker, T.; Morris, D. H.; Holbrook, M. G.; Gamble, A.;  
687 Williamson, B. N.; Tamin, A.; Harcourt, J. L.; Thornburg, N. J.; Gerber, S. I.; Lloyd-Smith, J.  
688 O.; de Wit, E.; Munster, V. J., Aerosol and Surface Stability of SARS-CoV-2 as Compared with  
689 SARS-CoV-1. *New Engl. J. Med.* **2020**, *382* (16), 1564-1567.
- 690 28. Mraz, A. L. Forecasting in the unseeable: A mixed methods model of planktonic and  
691 biofilm-bound in building water systems. Ph.D., The Ohio State University, Ann Arbor, 2018.
- 692 29. Gormley, M.; Aspray, T. J.; Kelly, D. A., COVID-19: mitigating transmission via  
693 wastewater plumbing systems. *The Lancet. Global health* **2020**.
- 694 30. Pan, Y.; Zhang, D.; Yang, P.; Poon, L. L. M.; Wang, Q., Viral load of SARS-CoV-2 in  
695 clinical samples. *The Lancet. Infectious diseases* **2020**, *20* (4), 411-412.
- 696 31. Holshue, M. L.; DeBolt, C.; Lindquist, S.; Lofy, K. H.; Wiesman, J.; Bruce, H.; Spitters, C.;  
697 Ericson, K.; Wilkerson, S.; Tural, A.; Diaz, G.; Cohn, A.; Fox, L.; Patel, A.; Gerber, S. I.; Kim,  
698 L.; Tong, S.; Lu, X.; Lindstrom, S.; Pallansch, M. A.; Weldon, W. C.; Biggs, H. M.; Uyeki, T.  
699 M.; Pillai, S. K., First Case of 2019 Novel Coronavirus in the United States. *New Engl. J. Med.*  
700 **2020**, *382* (10), 929-936.
- 701 32. Wu, Y.; Guo, C.; Tang, L.; Hong, Z.; Zhou, J.; Dong, X.; Yin, H.; Xiao, Q.; Tang, Y.; Qu,  
702 X.; Kuang, L.; Fang, X.; Mishra, N.; Lu, J.; Shan, H.; Jiang, G.; Huang, X., Prolonged presence  
703 of SARS-CoV-2 viral RNA in faecal samples. *The lancet. Gastroenterology & hepatology*  
704 **2020**.
- 705 33. Guan, W.-j.; Ni, Z.-y.; Hu, Y.; Liang, W.-h.; Ou, C.-q.; He, J.-x.; Liu, L.; Shan, H.; Lei,



- 706 C.-l.; Hui, D. S. C.; Du, B.; Li, L.-j.; Zeng, G.; Yuen, K.-Y.; Chen, R.-c.; Tang, C.-l.; Wang, T.;  
707 Chen, P.-y.; Xiang, J.; Li, S.-y.; Wang, J.-l.; Liang, Z.-j.; Peng, Y.-x.; Wei, L.; Liu, Y.; Hu,  
708 Y.-h.; Peng, P.; Wang, J.-m.; Liu, J.-y.; Chen, Z.; Li, G.; Zheng, Z.-j.; Qiu, S.-q.; Luo, J.; Ye,  
709 C.-j.; Zhu, S.-y.; Zhong, N.-s., Clinical Characteristics of Coronavirus Disease 2019 in China.  
710 *New Engl. J. Med.* **2020**.
- 711 34. *GetData Graph Digitizer* 2.26; <http://www.getdata-graph-digitizer.com/index.php>, 2013.
- 712 35. Poon, L. L. M.; Chan, K. H.; Wong, O. K.; Cheung, T. K. W.; Ng, I.; Zheng, B. J.; Seto, W.  
713 H.; Yuen, K. Y.; Guan, Y.; Peiris, J. S. M., Detection of SARS coronavirus in patients with  
714 severe acute respiratory syndrome by conventional and real-time quantitative reverse  
715 transcription-PCR assays. *Clin. Chem.* **2004**, *50* (1), 67-72.
- 716 36. Hung, I. F. N.; Cheng, V. C. C.; Wu, A. K. L.; Tang, B. S. F.; Chan, K. H.; Chu, C. M.;  
717 Wong, M. M. L.; Hui, W. T.; Poon, L. L. M.; Tse, D. M. W.; Chan, K. S.; Woo, P. C. Y.; Lau,  
718 S. K. P.; Peiris, J. S. M.; Yuen, K. Y., Viral loads in clinical specimens and SARS  
719 manifestations. *Emerging Infect. Dis.* **2004**, *10* (9), 1550-1557.
- 720 37. He, Z.-p.; Dong, Q.-m.; Song, S.-j.; He, L.; Zhuang, H., Detection for severe acute  
721 respiratory syndrome (SARS) coronavirus RNA in stool of SARS patients. *Zhonghua Yufang*  
722 *Yixue Zazhi* **2004**, *38* (2), 90-91.
- 723 38. Wyman, J. B.; Heaton, K. W.; Manning, A. P.; Wicks, A. C. B., VARIABILITY OF  
724 COLONIC FUNCTION IN HEALTHY SUBJECTS. *Gut* **1978**, *19* (2), 146-150.
- 725 39. Kubba, S., *Handbook of Green Building Design and Construction: LEED, BREEAM, and*  
726 *Green Globes, 2nd Edition*. 2017; p 1-1021.
- 727 40. Vicenzi, E.; Canducci, F.; Pinna, D.; Mancini, N.; Carletti, S.; Lazzarin, A.; Bordignon, C.;  
728 Poli, G.; Clementi, M., Coronaviridae and SARS-associated coronavirus strain HSR1.  
729 *Emerging Infect. Dis.* **2004**, *10* (3), 413-418.
- 730 41. Houg, H. S. H.; Norwood, D.; Ludwig, G. V.; Sun, W.; Lin, M. T.; Vaughn, D. W.,  
731 Development and evaluation of an efficient 3'-noncoding region based SARS coronavirus  
732 (SARS-CoV) RT-PCR assay for detection of SARS-CoV infections. *J. Virol. Methods* **2004**,  
733 *120* (1), 33-40.
- 734 42. O'Toole, J.; Keywood, M.; Sinclair, M.; Leder, K., Risk in the mist? Deriving data to  
735 quantify microbial health risks associated with aerosol generation by water-efficient devices  
736 during typical domestic water-using activities. *Water Sci Technol* **2009**, *60* (11), 2913-20.
- 737 43. Lai, A. C. K.; Tan, T. F.; Li, W. S.; Ip, D. K. M., Emission strength of airborne pathogens  
738 during toilet flushing. *Indoor Air* **2018**, *28* (1), 73-79.
- 739 44. Johnson, D.; Lynch, R.; Marshall, C.; Mead, K.; Hirst, D., Aerosol generation by modern  
740 flush toilets. *Aerosol Sci. Technol.* **2013**, *47* (9), 1047-1057.
- 741 45. Heyder, J.; Gebhart, J.; Rudolf, G.; Schiller, C. F.; Stahlhofen, W., Deposition of particles  
742 in the human respiratory tract in the size range 0.005–15  $\mu\text{m}$ . *J. Aerosol Sci* **1986**, *17* (5),  
743 811-825.
- 744 46. Moya, J.; Phillips, L.; Schuda, L.; Wood, P.; Diaz, A.; Lee, R.; Clickner, R.; Birch, R.;  
745 Adjei, N.; Blood, P., Exposure Factors Handbook: 2011 edition. *US Environmental Protection*  
746 *Agency: Washington* **2011**.
- 747 47. Watanabe, T.; Bartrand, T. A.; Weir, M. H.; Omura, T.; Haas, C. N., Development of a  
748 Dose-Response Model for SARS Coronavirus. *Risk Anal.* **2010**, *30* (7), 1129-1138.
- 749 48. Wang, Y.; Wang, Y.; Chen, Y.; Qin, Q., Unique epidemiological and clinical features of  
750 the emerging 2019 novel coronavirus pneumonia (COVID-19) implicate special control  
751 measures. *J. Med. Virol.* **2020**.
- 752 49. Ou, X.; Liu, Y.; Lei, X.; Li, P.; Mi, D.; Ren, L.; Guo, L.; Guo, R.; Chen, T.; Hu, J.; Xiang,  
753 Z.; Mu, Z.; Chen, X.; Chen, J.; Hu, K.; Jin, Q.; Wang, J.; Qian, Z., Characterization of spike  
754 glycoprotein of SARS-CoV-2 on virus entry and its immune cross-reactivity with SARS-CoV.  
755 *Nature communications* **2020**, *11* (1), 1620-1620.
- 756 50. Zhao, S.; Lin, Q.; Ran, J.; Musa, S. S.; Yang, G.; Wang, W.; Lou, Y.; Gao, D.; Yang, L.;  
757 He, D.; Wang, M. H., Preliminary estimation of the basic reproduction number of novel  
758 coronavirus (2019-nCoV) in China, from 2019 to 2020: A data-driven analysis in the early

- 759 phase of the outbreak. *Int. J. Infect. Dis.* **2020**, *92*, 214-217.
- 760 51. Davies, N. G.; Klepac, P.; Liu, Y.; Prem, K.; Jit, M.; Pearson, C. A. B.; Quilty, B. J.;  
761 Kucharski, A. J.; Gibbs, H.; Clifford, S.; Gimma, A.; van Zandvoort, K.; Munday, J. D.;  
762 Diamond, C.; Edmunds, W. J.; Houben, R. M. G. J.; Hellewell, J.; Russell, T. W.; Abbott, S.;  
763 Funk, S.; Bosse, N. I.; Sun, Y. F.; Flasche, S.; Rosello, A.; Jarvis, C. I.; Eggo, R. M.; group, C.  
764 C.-w., Age-dependent effects in the transmission and control of COVID-19 epidemics. *Nat.*  
765 *Med.* **2020**.
- 766 52. Viner, R. M.; Mytton, O. T.; Bonell, C.; Melendez-Torres, G. J.; Ward, J. L.; Hudson, L.;  
767 Waddington, C.; Thomas, J.; Russell, S.; van der Klis, F.; Panovska-Griffiths, J.; Davies, N. G.;  
768 Booy, R.; Eggo, R., Susceptibility to and transmission of COVID-19 amongst children and  
769 adolescents compared with adults: a systematic review and meta-analysis. *medRxiv* **2020**,  
770 2020.05.20.20108126.
- 771 53. Donnelly, C. A.; Ghani, A. C.; Leung, G. M.; Hedley, A. J.; Fraser, C.; Riley, S.;  
772 Abu-Raddad, L. J.; Ho, L. M.; Thach, T. Q.; Chau, P.; Chan, K. P.; Lam, T. H.; Tse, L. Y.;  
773 Tsang, T.; Liu, S. H.; Kong, J. H. B.; Lau, E. M. C.; Ferguson, N. M.; Anderson, R. M.,  
774 Epidemiological determinants of spread of causal agent of severe acute respiratory syndrome in  
775 Hong Kong. *Lancet* **2003**, *361* (9371), 1761-1766.
- 776 54. Lim, K.-Y.; Jiang, S. C., Reevaluation of health risk benchmark for sustainable water  
777 practice through risk analysis of rooftop-harvested rainwater. *Water Res.* **2013**, *47* (20),  
778 7273-7286.
- 779 55. The-MathWorks-Inc *MATLAB R2019b*, Natick, MA, 2019.
- 780 56. Yu, I. T.-S.; Qiu, H.; Tse, L. A.; Wong, T. W., Severe Acute Respiratory Syndrome  
781 Beyond Amoy Gardens: Completing the Incomplete Legacy. *Clin. Infect. Dis.* **2014**, *58* (5),  
782 683-686.
- 783 57. Ng, S. K. C., Possible role of an animal vector in the SARS outbreak at Amoy Gardens.  
784 *Lancet* **2003**, *362* (9383), 570-572.
- 785 58. DeDiego, M. L.; Pewe, L.; Alvarez, E.; Rejas, M. T.; Perlman, S.; Enjuanes, L.,  
786 Pathogenicity of severe acute respiratory coronavirus deletion mutants in hACE-2 transgenic  
787 mice. *Virology* **2008**, *376* (2), 379-389.
- 788 59. Bradburne, A. F.; Bynoe, M. L.; Tyrrell, D. A. J., EFFECTS OF A NEW HUMAN  
789 RESPIRATORY VIRUS IN VOLUNTEERS. *Bmj-British Medical Journal* **1967**, *3* (5568),  
790 767-+.
- 791 60. NYC Environmental Protection Wastewater Treatment Plants.  
792 <https://www1.nyc.gov/site/dep/water/wastewater-treatment-plants.page>.
- 793 61. Information-Office-of-Guangzhou-Municipal-People's-Government The 125th press  
794 conference on epidemic prevention and control in Guangzhou.  
795 <https://m.dayoo.com/160433.shtml>.
- 796 62. Beijing-TV How are people without direct contact to Xinfadi Market infected by  
797 COVID-19. <https://v.qq.com/x/cover/mzc00200q7qjnlg/f3104zj1qc4.html>.

798
